# Supplementary material
Source: PubMed Central journal article supplement (PMC10468731)
Supplement: 10-1055-s-0043-1771394-s202211ra0307.pdf [file 10-1055-s-0043-1771394-s202211ra0307.pdf]

## Supplementary Appendix A EFA results

| Items  | 1     | 2     | 3     | 4     | 5     | 6     | 7 | 8 | 9 | 10 | 11 | 12 | 13 | 14 | Remark               |                          |
|--------|-------|-------|-------|-------|-------|-------|---|---|---|----|----|----|----|----|----------------------|--------------------------|
| C1     | 0.821 |       |       |       |       |       |   |   |   |    |    |    |    |    | Relabel as knowledge |                          |
| C2     | 0.974 |       |       |       |       |       |   |   |   |    |    |    |    |    |                      |                          |
| C3     | 0.719 |       |       |       |       |       |   |   |   |    |    |    |    |    |                      |                          |
| C4     |       | 0.598 |       |       |       |       |   |   |   |    |    |    |    |    |                      | Relabel as typing skills |
| C5     |       | 0.883 |       |       |       |       |   |   |   |    |    |    |    |    |                      |                          |
| SQ1    |       |       | 0.730 |       |       |       |   |   |   |    |    |    |    |    | System quality       |                          |
| SQ2    |       |       | 0.655 |       |       |       |   |   |   |    |    |    |    |    |                      |                          |
| SQ3    |       |       | 0.882 |       |       |       |   |   |   |    |    |    |    |    |                      |                          |
| SQ4    |       |       | 0.873 |       |       |       |   |   |   |    |    |    |    |    |                      |                          |
| SQ5    |       |       | 0.753 |       |       |       |   |   |   |    |    |    |    |    |                      |                          |
| SQ6    |       |       | 0.554 |       |       |       |   |   |   |    |    |    |    |    |                      |                          |
| SQ7    |       |       | 0.790 |       |       |       |   |   |   |    |    |    |    |    |                      |                          |
| SQ8    |       |       | 0.820 |       |       |       |   |   |   |    |    |    |    |    |                      |                          |
| SQ9    |       |       | 0.640 |       |       |       |   |   |   |    |    |    |    |    |                      |                          |
| IQ1    |       |       |       | 0.907 |       |       |   |   |   |    |    |    |    |    | Information quality  |                          |
| IQ2    |       |       |       | 0.962 |       |       |   |   |   |    |    |    |    |    |                      |                          |
| IQ3    |       |       |       | 0.637 |       |       |   |   |   |    |    |    |    |    |                      |                          |
| IQ4    |       |       |       | 0.798 |       |       |   |   |   |    |    |    |    |    |                      |                          |
| IQ5    |       |       |       | 0.860 |       |       |   |   |   |    |    |    |    |    |                      |                          |
| IQ6    |       |       |       | 0.795 |       |       |   |   |   |    |    |    |    |    |                      |                          |
| IQ7    |       |       |       | 0.728 |       |       |   |   |   |    |    |    |    |    |                      |                          |
| ServQ1 |       |       |       |       | 0.780 |       |   |   |   |    |    |    |    |    | Service quality      |                          |
| ServQ2 |       |       |       |       | 0.919 |       |   |   |   |    |    |    |    |    |                      |                          |
| ServQ3 |       |       |       |       | 0.862 |       |   |   |   |    |    |    |    |    |                      |                          |
| ServQ4 |       |       |       |       | 0.861 |       |   |   |   |    |    |    |    |    |                      |                          |
| ServQ5 |       |       |       |       | 0.631 |       |   |   |   |    |    |    |    |    |                      |                          |
| T1     |       |       |       |       |       | 0.682 |   |   |   |    |    |    |    |    | Training             |                          |
| T2     |       |       |       |       |       | 0.830 |   |   |   |    |    |    |    |    |                      |                          |
| T3     |       |       |       |       |       | 0.995 |   |   |   |    |    |    |    |    |                      |                          |
| T4     |       |       |       |       |       | 0.884 |   |   |   |    |    |    |    |    |                      |                          |
| T5     |       |       |       |       |       | 0.536 |   |   |   |    |    |    |    |    |                      |                          |

(Continued)

Supplementary Appendix A (Continued)

| Items | 1 | 2 | 3 | 4 | 5 | 6 | 7     | 8     | 9     | 10    | 11    | 12    | 13    | 14    | Remark                          |
|-------|---|---|---|---|---|---|-------|-------|-------|-------|-------|-------|-------|-------|---------------------------------|
| TW1   |   |   |   |   |   |   | 0.735 |       |       |       |       |       |       |       | Teamwork                        |
| TW2   |   |   |   |   |   |   | 0.896 |       |       |       |       |       |       |       |                                 |
| TW3   |   |   |   |   |   |   | 0.885 |       |       |       |       |       |       |       |                                 |
| TW4   |   |   |   |   |   |   | 0.568 |       |       |       |       |       |       |       |                                 |
| OR1   |   |   |   |   |   |   |       | 0.504 |       |       |       |       |       |       | Organization resources          |
| OR2   |   |   |   |   |   |   |       | 0.980 |       |       |       |       |       |       |                                 |
| OR3   |   |   |   |   |   |   |       | 0.862 |       |       |       |       |       |       |                                 |
| OR4   |   |   |   |   |   |   |       | 0.536 |       |       |       |       |       |       |                                 |
| TS1   |   |   |   |   |   |   |       |       | 0.721 |       |       |       |       |       | Task                            |
| TS2   |   |   |   |   |   |   |       |       | 0.825 |       |       |       |       |       |                                 |
| TS3   |   |   |   |   |   |   |       |       | 0.720 |       |       |       |       |       |                                 |
| TS4   |   |   |   |   |   |   |       |       | 0.757 |       |       |       |       |       |                                 |
| TS5   |   |   |   |   |   |   |       |       | 0.775 |       |       |       |       |       |                                 |
| V1    |   |   |   |   |   |   |       |       |       | 0.522 |       |       |       |       | Vigilance                       |
| V2    |   |   |   |   |   |   |       |       |       | 0.573 |       |       |       |       |                                 |
| V3    |   |   |   |   |   |   |       |       |       | 0.693 |       |       |       |       |                                 |
| CP2   |   |   |   |   |   |   |       |       |       | 0.691 |       |       |       |       |                                 |
| CP3   |   |   |   |   |   |   |       |       |       | 0.639 |       |       |       |       |                                 |
| WP1   |   |   |   |   |   |   |       |       |       | 0.716 |       |       |       |       | Procedure compliance            |
| WP2   |   |   |   |   |   |   |       |       |       | 0.735 |       |       |       |       |                                 |
| CP1   |   |   |   |   |   |   |       |       |       |       | 0.463 |       |       |       |                                 |
| WP3   |   |   |   |   |   |   |       |       |       |       | 0.650 |       |       |       |                                 |
| WP5   |   |   |   |   |   |   |       |       |       |       | 0.558 |       |       |       |                                 |
| W4    |   |   |   |   |   |   |       |       |       |       |       | 0.661 |       |       | Workarounds                     |
| W5    |   |   |   |   |   |   |       |       |       |       |       | 0.473 |       |       |                                 |
| NB1   |   |   |   |   |   |   |       |       |       |       |       |       | 0.718 |       | Relabel as patient safety       |
| NB2   |   |   |   |   |   |   |       |       |       |       |       |       | 0.791 |       |                                 |
| NB3   |   |   |   |   |   |   |       |       |       |       |       |       |       | 0.698 | Relabel as patient-care quality |
| NB4   |   |   |   |   |   |   |       |       |       |       |       |       |       | 0.780 |                                 |
| NB5   |   |   |   |   |   |   |       |       |       |       |       |       |       | 0.926 |                                 |

Abbreviation: EFA, exploratory factor analysis.

## Supplementary Appendix B Final SafeHIT items

| Code                   | Items                                                                                                                          |
|------------------------|--------------------------------------------------------------------------------------------------------------------------------|
| HIT knowledge          |                                                                                                                                |
| C1                     | As a user of HIT in this hospital, I understand all functions dedicated for me in the HIT. <sup>a</sup>                        |
| C2                     | As a user of HIT in this hospital, I know to use all the functions dedicated to me in the HIT to perform my task. <sup>a</sup> |
| C3                     | As a user of HIT in this hospital, I consider my knowledge on HIT to be good enough to use HIT appropriately. <sup>a</sup>     |
| Typing skill           |                                                                                                                                |
| C4                     | As a user of HIT in this hospital, I can type at the same time having eye contact and interaction with a patient. <sup>a</sup> |
| C5                     | As a user of HIT in this hospital, I can type fast. <sup>a</sup>                                                               |
| System quality         |                                                                                                                                |
| SQ1                    | HIT of this hospital is easy to use.                                                                                           |
| SQ3                    | Routine tasks can be performed in a straightforward manner using the HIT.                                                      |
| SQ4                    | HIT of this hospital is well designed to allow me to enter comprehensive information. <sup>a</sup>                             |
| SQ5                    | HIT of this hospital uses terms that are clear and easy to understand.                                                         |
| SQ6                    | HIT of this hospital uses consistent words, terminology, and sequence of action. <sup>a</sup>                                  |
| SQ7                    | HIT of this hospital responds quickly enough to inputs.                                                                        |
| SQ8                    | HIT of this hospital fit my actual work practice and workflow. <sup>a</sup>                                                    |
| SQ9                    | HIT of this hospital provides an adequate function to support my work.                                                         |
| Information quality    |                                                                                                                                |
| IQ1                    | HIT of this hospital provides complete information.                                                                            |
| IQ2                    | HIT of this hospital provides information that I exactly need.                                                                 |
| IQ3                    | HIT of this hospital presents information in a useful format.                                                                  |
| IQ5                    | HIT of this hospital provides accurate and reliable information.                                                               |
| IQ6                    | HIT of this hospital provides up-to-date information.                                                                          |
| IQ7                    | HIT of this hospital provides timely information.                                                                              |
| Service quality        |                                                                                                                                |
| ServQ1                 | IT support staff of this hospital is always willing to help users.                                                             |
| ServQ2                 | IT support staff of this hospital gives prompt service to users.                                                               |
| ServQ3                 | IT support staff of this hospital has the knowledge to do their job well.                                                      |
| ServQ4                 | IT support staff of this hospital performs continuous updates and maintenance of the HIT.                                      |
| ServQ5                 | IT support staff of this hospital performs continuous maintenance of hardware related to the HIT.                              |
| Organization resources |                                                                                                                                |
| OR1                    | This hospital has enough department staff to handle the workload.                                                              |
| OR2                    | This hospital has enough computers and laptops that are functioning well.                                                      |
| OR3                    | This hospital provides high-speed computers and laptops to access the HIT. <sup>a</sup>                                        |
| OR4                    | I have enough time to complete patient-care tasks safely.                                                                      |
| Training               |                                                                                                                                |
| T1                     | As a user of this hospital, I am provided with adequate training on HIT.                                                       |
| T2                     | As a user of this hospital, there is periodic HIT training to update my knowledge.                                             |
| T3                     | As a user of this hospital, training was provided for new procedure or improvement of the HIT.                                 |
| T4                     | As a user of this hospital, training provided appropriate skills and experience for safe use of HIT.                           |
| T5                     | As a user of this hospital, I know how to respond in the event of system downtime.                                             |
| Teamwork               |                                                                                                                                |
| TW1                    | As an employee of this hospital, it is easy for me to ask questions when there is something that I do not understand.          |
| TW2                    | As an employee of this hospital, I received clear instruction from my team partner. <sup>a</sup>                               |

(Continued)

**Supplementary Appendix B** (Continued)

| Code                  | Items                                                                                                                                |
|-----------------------|--------------------------------------------------------------------------------------------------------------------------------------|
| TW3                   | As an employee of this hospital, employees in this department coordinate well with each other.                                       |
| TW4                   | As an employee of this hospital, there is good cooperation among hospital departments.                                               |
| Task-related stressor |                                                                                                                                      |
| TS1                   | As an employee of this hospital, I am often pressed for time.                                                                        |
| TS2                   | As an employee of this hospital, my work is often delayed because of having too much to do.                                          |
| TS3                   | As an employee of this hospital, I often work at several tasks simultaneously and jump back and forth between these tasks.           |
| TS4                   | As an employee of this hospital, I often think of many different issues while doing work.                                            |
| TS5                   | As an employee of this hospital, I often have to interrupt my current work because of colleagues and patients.                       |
| Vigilance             |                                                                                                                                      |
| V1                    | I give adequate attention to complete my task properly. <sup>a</sup>                                                                 |
| V2                    | I perform double check despite having limited time. <sup>a</sup>                                                                     |
| V3                    | I make sure that I sign all my notes in the HIT. <sup>a</sup>                                                                        |
| CP2                   | I double check the information carefully every time after copying and pasting a new entry in the HIT. <sup>a</sup>                   |
| CP3                   | I always update the related information after copying and pasting a new entry in the HIT. <sup>a</sup>                               |
| WP1                   | I always read the appeared alert in the HIT carefully. <sup>a</sup>                                                                  |
| WP2                   | I use an appropriate function to perform a particular task in the HIT. <sup>a</sup>                                                  |
| Workarounds           |                                                                                                                                      |
| W4                    | I rely on my memory when performing task in the HIT. <sup>a</sup>                                                                    |
| W5                    | I only refer to the HIT when handing over task rather than communicating verbally with my colleague. <sup>a</sup>                    |
| Procedure compliance  |                                                                                                                                      |
| CP1                   | I copy and paste the information from the HIT. <sup>a</sup>                                                                          |
| WP3                   | I sometimes use my colleague login account to access the HIT. <sup>a</sup>                                                           |
| WP5                   | Under certain circumstance, I adopt shortcut and do not follow procedure when using the HIT. <sup>a</sup>                            |
| Patient safety        |                                                                                                                                      |
| NB1                   | As a HIT user of this hospital, I believe that using HIT has resulted in error toward patient harm for this department. <sup>a</sup> |
| NB2                   | As a HIT user of this hospital, I believe that it is just by chance that more serious mistakes do not happen around here.            |
| Patient-care quality  |                                                                                                                                      |
| NB3                   | As a HIT user of this hospital, I believe that using HIT enhances the efficiency of my job. <sup>a</sup>                             |
| NB5                   | As a HIT user of this hospital, I believe that overall, using HIT improves the quality of patient care.                              |

<sup>a</sup>The items originally contributed by the authors.
